# Supplementary material for: Single-nucleus profiling unveils a geroprotective role of the FOXO3 in primate skeletal muscle aging
Source: PubMed Central journal article supplement (PMC10305740; doi:10.1093/procel/pwac061), 2022-11-22

1 **Supplemental Materials**

2 **Figure S1. Information of cynomolgus monkeys and quality control of single-nucleus**  
3 **RNA-seq of NHP skeletal muscle.**

- 4 (A) Information of the cynomolgus monkeys used in this study.  
5 (B) Left, PI and Hoechst double-positive nuclei were enriched by FACS. Right, representative  
6 images of nuclei after sorting. Scale bars, 50 and 10  $\mu\text{m}$  (zoomed-in image).  
7 (C) Left, bar plot showing nucleus number of each sample. Right, plot showing the  $\text{Log}_{10}$  ratio  
8 of reads per nucleus and sequencing saturation of each sample.  
9 (D) Left, box plot showing the unique molecular identifiers (UMIs) in each nucleus. Right, box  
10 plot showing the number of genes detected in each nucleus.  
11 (E) UMAP plot showing the distribution of clusters across all samples.  
12 (F) Stack bar plot showing the cell proportion of each sample in 14 cell types.  
13 (G) Bar plot showing the number of nuclei captured across cell types.

14 **Figure S2. Single-nucleus transcriptome profiling of young and old cynomolgus monkey**  
15 **skeletal muscles.**

- 16 (A) Box plots showing the cell proportion of each sample across different cell types. The  $P$   
17 values between old and young groups were calculated using one-sided Wilcoxon Rank Sum  
18 test.  
19 (B) Immunofluorescence staining of VWF and SMA in the skeletal muscle from young and old  
20 monkeys. Representative images are shown on the left; Scale bars, 50 and 20  $\mu\text{m}$  (zoomed-  
21 in image). The numbers of VWF-positive and SMA-negative cells were quantified as fold  
22 changes in old skeletal muscles vs. in young counterparts and are presented as mean  $\pm$  SEMs  
23 on the right.  $n = 8$  monkeys for each group.  
24 (C) Heatmap showing the expression profiles of genes differentially expressed in at least five  
25 cell types in the monkey skeletal muscle. Only genes with same direction of differential  
26 expression among different cell types are included.  
27 (D) Heatmap showing the expression profiles of top 5 differentially expressed genes (DEGs)  
28 for each cell type.  
29 (E) Heatmap showing the scaled expression patterns of hotspot genes for muscle diseases-  
30 related genes in different cell types.  
31 (F) Network visualization of upregulated core regulatory TFs in different cell types between  
32 old and young groups. Outer nodes display different cell types and the node size positively  
33 correlates with the number of target genes differentially expressed in corresponding cell  
34 types.  
35 (G) Representative images of negative control of *FOXO3* pre-mRNA labeling in monkey  
36 skeletal muscle by RNA-FISH. Scale bar, 20  $\mu\text{m}$ .

37 **Figure S3. Phenotypic and transcriptomic analyses of human myotubes upon silence or**  
38 **genetic activation of FOXO3.**

- 1 (A) MyHC immunofluorescence staining showing the differentiation efficiency of FOXO3<sup>+/+</sup>  
2 and FOXO3<sup>-/-</sup> hMyotubes. Representative images are shown on the left; Scale bar, 100 μm.  
3 Data are presented as mean ± SEMs, *n* = 3 biological replicates for each group.  
4 (B) Schematic showing the siRNA-mediated knockdown of *FOXO3* in WT hMyotubes.  
5 (C) FOXO3 immunofluorescence staining in FOXO3<sup>+/+</sup> and FOXO3<sup>2SA/2SA</sup> hMyotubes.  
6 Representative images are shown on the left; Scale bar, 50 μm. The numbers of FOXO3-  
7 positive nuclei were quantified as fold changes (FOXO3<sup>2SA/2SA</sup> vs. FOXO3<sup>+/+</sup>) and are  
8 presented as mean ± SEMs. *n* = 3 biological replicates for each group.  
9 (D) Heatmap showing Euclidean distance of gene expression profiles between FOXO3<sup>-/-</sup> and  
10 FOXO3<sup>+/+</sup> hMyotubes.  
11 (E) Heatmap showing the transcript levels of indicated genes in FOXO3<sup>+/+</sup> and FOXO3<sup>-/-</sup>  
12 hMyotubes by RT-qPCR. *n* = 3 biological replicates for each group.

### 13 **Supplementary Tables**

14 **Table S1.** Differentially expressed genes of bulk RNA-seq and snRNA-seq datasets.

15 **Table S2.** The marker genes of each cell type in monkey skeletal muscle.

16 **Table S3.** Gene sets used in this study.

17 **Table S4.** Core regulatory transcription factors of differentially expressed genes in monkey  
18 skeletal muscle during aging.

19 **Table S5.** List of antibodies used in this study.

20 **Table S6.** The sequences for primers used in this study.

21

**Figure S1**

**A**

| No. | Sex    | Animal Symbol | Age (years) | No. | Sex  | Animal Symbol | Age (years) |
|-----|--------|---------------|-------------|-----|------|---------------|-------------|
| 1   | Female | YF1           | 5           | 5   | Male | YM1           | 5           |
| 2   | Female | YF2           | 5           | 6   | Male | YM2           | 5           |
| 3   | Female | YF3           | 5           | 7   | Male | YM3           | 6           |
| 4   | Female | YF4           | 4           | 8   | Male | YM4           | 6           |
| 9   | Female | OF1           | 18          | 13  | Male | OM1           | 18          |
| 10  | Female | OF2           | 19          | 14  | Male | OM2           | 19          |
| 11  | Female | OF3           | 19          | 15  | Male | OM3           | 20          |
| 12  | Female | OF4           | 20          | 16  | Male | OM4           | 21          |

**B**

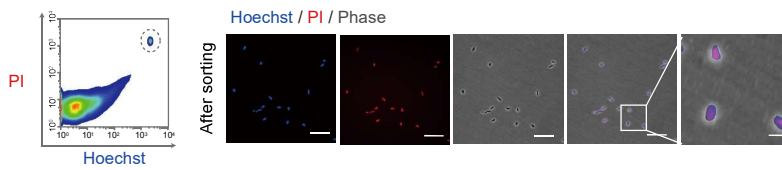

**C**

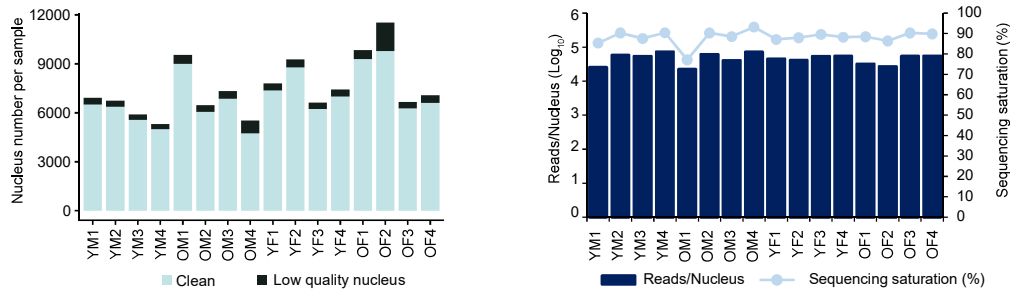

**D**

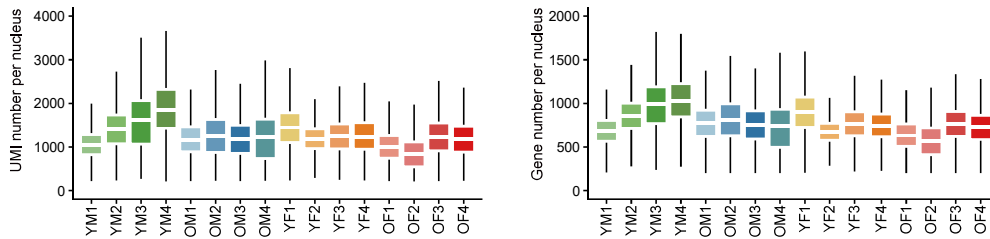

**E**

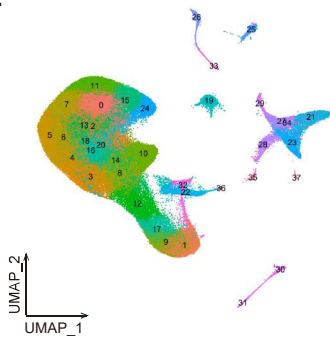

**F**

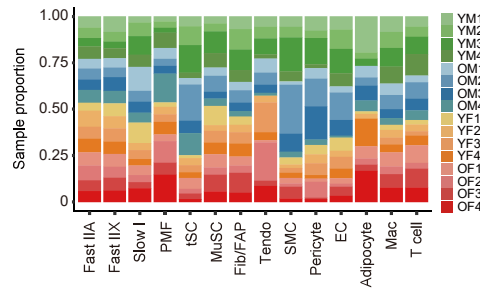

**G**

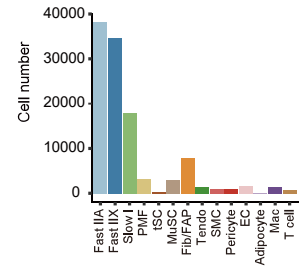

**Figure S2**

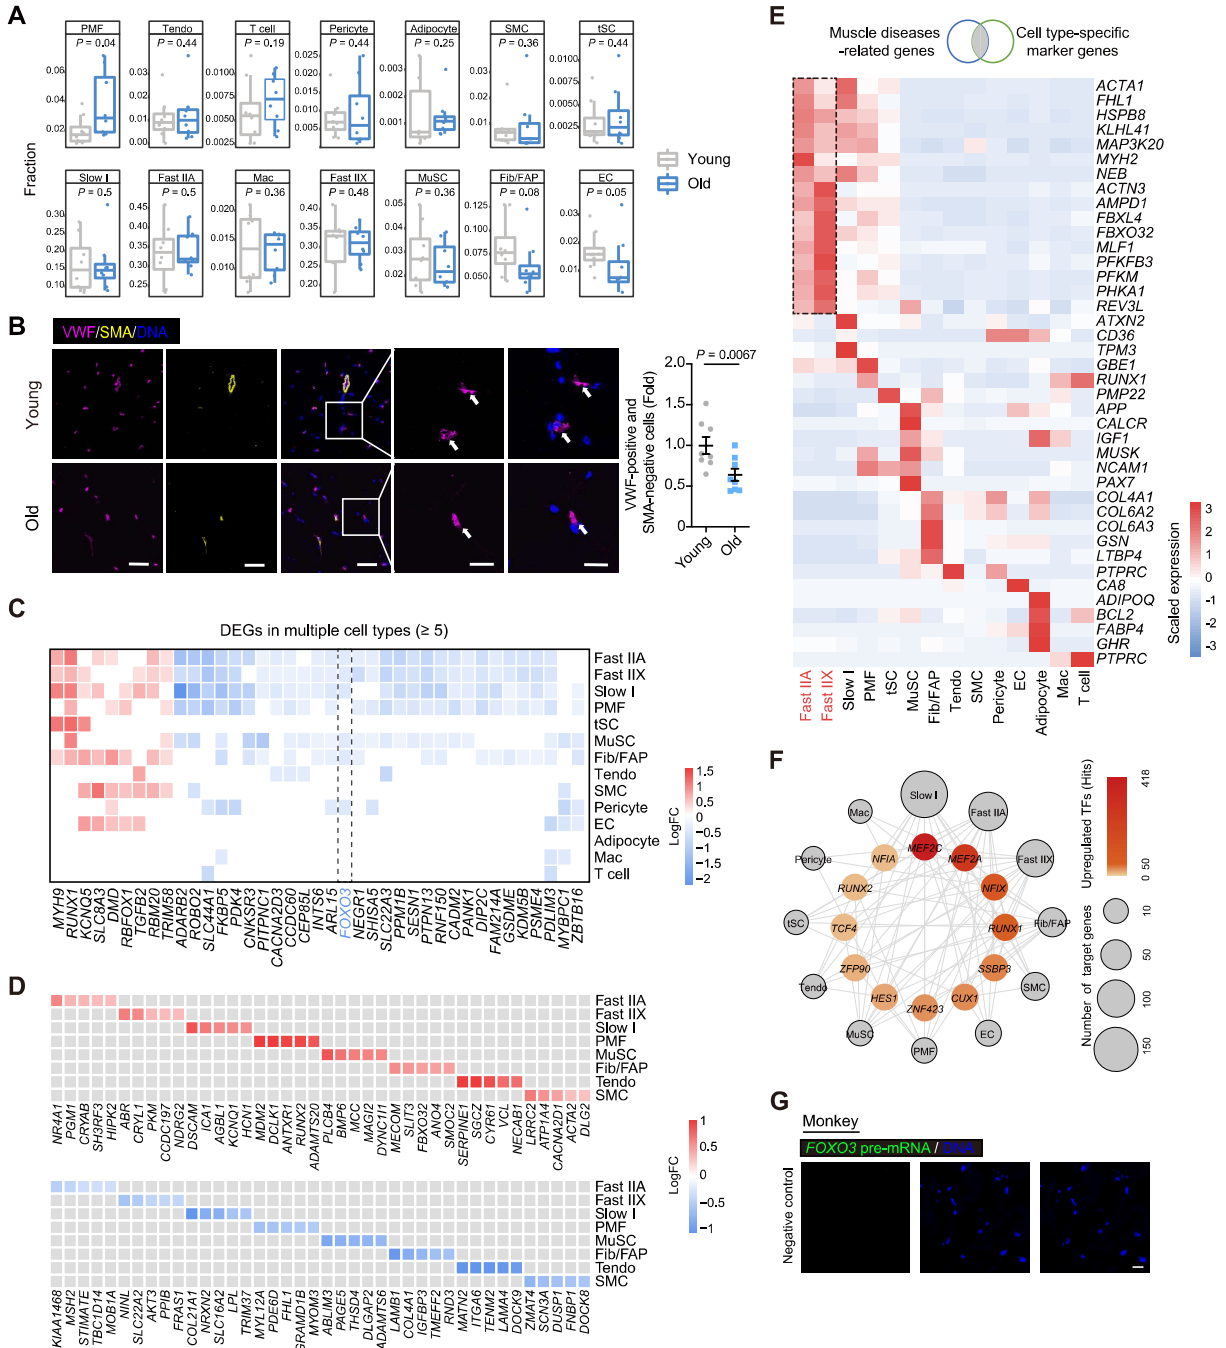

**Figure S3**

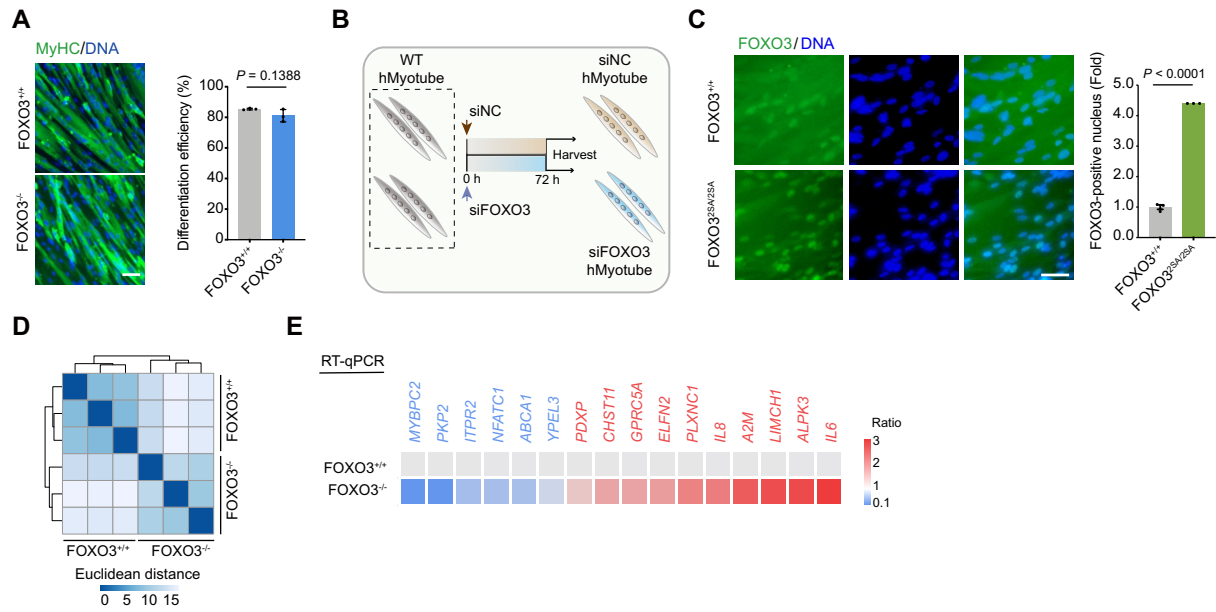

Supplement: pwac061_suppl_supplementary_materials.pdf [file pwac061_suppl_supplementary_materials.pdf]
